# Supplementary material for: Synthesis, conformational analysis and GalNAc–lectin interactions of a constrained C-glycoside analogue of the TN antigen
Source: Royal Society of Chemistry journal article supplement (doi:10.1039/d3nj05184f), 2023-12-28
Supplement: d3nj05184f2.pdf [file d3nj05184f2.pdf]

## SUPPORTING INFORMATION - part B

# Synthesis, Conformational Analysis and GalNAc-Lectin Interactions of constrained C-glycoside analogue of T<sub>N</sub> antigen

Juliette Dourdan, Florian Rouzier, Thanh Thao Huynh, Sullivan Bricaud, Arnaud Nourry,\* Stéphane Guillarme\*

*Institut des Molécules et des Matériaux du Mans, UMR 6283 CNRS and Le Mans Université,  
Avenue O. Messiaen, 72085 Le Mans, France.*

### DFT calculation data

A complete conformational search was first undertaken at Molecular Mechanics (MM) level using Spartan Software<sup>1</sup> with MMFF Force Field. The 100 most stable conformers of **1** and **2** were selected for geometry optimization by increasing level of theory from semi-empirical (PM6) to DFT (B3LYP/3-21G). The geometries of the most stable conformers were then optimized by DFT calculations carried out with Gaussian 16<sup>2</sup> at M06-2X/6-311+G(d,p) level.<sup>3</sup> The SMD model<sup>4</sup> was used for the description of water as solvent during the optimization process as well as in the final frequency calculations. For the 20 most stable conformers, the Electronic energy (E), zero-point energy (ZPE), enthalpy (H), Gibbs free energy (G) were calculated at 298 K or 353 K and the Boltzmann distribution was computed from the  $\Delta G$  according to  $\frac{e(-\frac{\Delta G}{RT})}{\sum e(-\frac{\Delta G}{RT})}$ . The results of the 10 most stable conformers are presented in the following tables.

### Summary

- 1) Table of energies (E, Ezpe, H and G) in Hartree and Boltzmann distribution for the conformers of **1** at 298 K
- 2) Table of energies (E, Ezpe, H and G) in Hartree and Boltzmann distribution for the conformers of **2** at 298 K and 353 K.
- 3) Geometries of the conformers of **1**
- 4) Geometries of the conformers of **2**
- 1) Table of energies (E, Ezpe, H and G) in Hartree and Boltzmann distribution for the conformers of **1** at 298 K

<sup>1</sup> Spartan'10, Wavefunction, INC., Irvine, CA.

<sup>2</sup> M.e. Frisch, G. Trucks, H.B. Schlegel, G. Scuseria, M. Robb, J. Cheeseman, G. Scalmani, V. Barone, G. Petersson, H. Nakatsuji, Gaussian 16, Gaussian, Inc. Wallingford, CT2016.

<sup>3</sup> Zhao, Y., Truhlar, D. G., *Theor.Chem.Acc.* **2007**, *120*, 215–241.

<sup>4</sup> A. V. Marenich, C.J. Cramer, D. G. Truhlar, *J. Phys. Chem.* **2009**, *113(18)*, 6378-6396.

| T = 298 K |              |              |              |              |            |                        |                             |
|-----------|--------------|--------------|--------------|--------------|------------|------------------------|-----------------------------|
| 1-Conf-x  | E            | ZPE energy   | H            | G            | $\Delta G$ | Boltzmann Distribution | Conformation                |
| 1-Conf-2  | -1314,133889 | -1341,16162  | -1314,132945 | -1314,221937 | 0          | 66,9%                  | <sup>4</sup> C <sub>1</sub> |
| 1-Conf-8  | -1314,135507 | -1314,162638 | -1314,134563 | -1314,220438 | 0,001499   | 13,7%                  | <sup>4</sup> C <sub>1</sub> |
| 1-Conf-20 | -1314,133992 | -1314,161251 | -1314,133048 | -1314,220173 | 0,001764   | 10,3%                  | <sup>4</sup> C <sub>1</sub> |
| 1-Conf-1  | -1314,132245 | -1314,159556 | -1314,131301 | -1314,219212 | 0,002725   | 3,7%                   | <sup>4</sup> C <sub>1</sub> |
| 1-Conf-5  | -1314,132577 | -1314,159752 | -1314,131633 | -1314,218316 | 0,003621   | 1,4%                   | <sup>4</sup> C <sub>1</sub> |
| 1-Conf-6  | -1314,129972 | -1314,157412 | -1314,129028 | -1314,218124 | 0,003813   | 1,2%                   | <sup>4</sup> C <sub>1</sub> |
| 1-Conf-12 | -1314,131898 | -1314,159104 | -1314,130954 | -1314,217765 | 0,004172   | 0,8%                   | <sup>4</sup> C <sub>1</sub> |
| 1-Conf-9  | -1314,132066 | -1314,159087 | -1314,131121 | -1314,217718 | 0,004219   | 0,8%                   | <sup>4</sup> C <sub>1</sub> |
| 1-Conf-7  | -1314,132223 | -1314,159449 | -1314,131279 | -1314,217558 | 0,004379   | 0,6%                   | <sup>4</sup> C <sub>1</sub> |
| 1-Conf-10 | -1314,13403  | -1314,160841 | -1314,133086 | -1314,217509 | 0,004428   | 0,6%                   | <sup>4</sup> C <sub>1</sub> |

|        |
|--------|
| 100,0% |
|--------|

|        |                             |
|--------|-----------------------------|
| 100,0% | <sup>4</sup> C <sub>1</sub> |
| 0,0%   | Twist Boat                  |
| 0,0%   | <sup>1</sup> C <sub>4</sub> |

2) Table of energies (E, Ezpe, H and G) in Hartree and Boltzmann distribution for the conformers of **2** at 298 K and 353 K.

| T = 298 K |              |              |              |              |            |                        |                |
|-----------|--------------|--------------|--------------|--------------|------------|------------------------|----------------|
| 2-Conf-x  | E            | ZPE energy   | H            | G            | $\Delta G$ | Boltzmann Distribution | Conformation   |
| 2-Conf-15 | -1352,157303 | -1352,184809 | -1352,156359 | -1352,244302 | 0          | 59,1%                  | Pseudo $^4C_1$ |
| 2-Conf-7  | -1352,155903 | -1352,183312 | -1352,154958 | -1352,243104 | 0,001198   | 16,6%                  | Pseudo $^4C_1$ |
| 2-Conf-9  | -1352,157007 | -1352,18403  | -1352,156062 | -1352,241972 | 0,00233    | 5,0%                   | Twist Boat     |
| 2-Conf-18 | -1352,156611 | -1352,183643 | -1352,155667 | -1352,241948 | 0,002354   | 4,9%                   | Twist Boat     |
| 2-Conf-17 | -1352,156104 | -1352,182998 | -1352,155159 | -1352,241733 | 0,002569   | 3,9%                   | Pseudo $^1C_4$ |
| 2-Conf-3  | -1352,157376 | -1352,184086 | -1352,156432 | -1352,24151  | 0,002792   | 3,1%                   | Twist Boat     |
| 2-Conf-6  | -1352,155749 | -1352,182711 | -1352,158405 | -1352,241249 | 0,003053   | 2,3%                   | Twist Boat     |
| 2-Conf-14 | -1352,15784  | -1352,184568 | -1352,156896 | -1352,241248 | 0,003054   | 2,3%                   | Pseudo $^1C_4$ |
| 2-Conf-11 | -1352,157102 | -1352,183989 | -1352,156158 | -1352,24101  | 0,003292   | 1,8%                   | Twist Boat     |
| 2-Conf-8  | -1352,156503 | -1352,183275 | -1352,155559 | -1352,240541 | 0,003761   | 1,1%                   | Twist Boat     |
|           |              |              |              |              |            | 100,0%                 |                |

|              |                |
|--------------|----------------|
| <b>75,7%</b> | Pseudo $^4C_1$ |
| <b>18,1%</b> | Twist Boat     |
| <b>6,2%</b>  | Pseudo $^1C_4$ |

| T = 353 K |              |              |              |              |            |                        |                |
|-----------|--------------|--------------|--------------|--------------|------------|------------------------|----------------|
| 2-Conf-x  | E            | ZPE energy   | H            | G            | $\Delta G$ | Boltzmann Distribution | Conformation   |
| 2-Conf-15 | -1352,147809 | -1352,184809 | -1352,146691 | -1352,2613   | 0          | 55,5%                  | Pseudo $^4C_1$ |
| 2-Conf-7  | -1352,146435 | -1352,183312 | -1352,145317 | -1352,260137 | 0,001163   | 19,6%                  | Pseudo $^4C_1$ |
| 2-Conf-18 | -1352,147181 | -1352,183643 | -1352,146063 | -1352,258634 | 0,002666   | 5,1%                   | Twist Boat     |
| 2-Conf-9  | -1352,147576 | -1352,18403  | -1352,146458 | -1352,258589 | 0,002711   | 4,9%                   | Twist Boat     |
| 2-Conf-17 | -1352,146704 | -1352,182998 | -1352,145586 | -1352,25847  | 0,00283    | 4,4%                   | Pseudo $^1C_4$ |
| 2-Conf-3  | -1352,147981 | -1352,184086 | -1352,146863 | -1352,257971 | 0,003329   | 2,8%                   | Twist Boat     |
| 2-Conf-6  | -1352,146321 | -1352,182711 | -1352,145204 | -1352,257965 | 0,003335   | 2,8%                   | Twist Boat     |
| 2-Conf-14 | -1352,148458 | -1352,184568 | -1352,14734  | -1352,257575 | 0,003725   | 2,0%                   | Pseudo $^1C_4$ |
| 2-Conf-11 | -1352,14767  | -1352,183989 | -1352,146552 | -1352,257434 | 0,003866   | 1,7%                   | Twist Boat     |
| 2-Conf-8  | -1352,147097 | -1352,183275 | -1352,145979 | -1352,256986 | 0,004314   | 1,2%                   | Twist Boat     |
|           |              |              |              |              |            | 100,0%                 |                |

|              |                |
|--------------|----------------|
| <b>75,1%</b> | Pseudo $^4C_1$ |
| <b>18,5%</b> | Twist Boat     |
| <b>6,4%</b>  | Pseudo $^1C_4$ |

### 3) Geometries of the conformers of **1**

The geometries of the conformers of the molecule **1** are given in XYZ format.

#### a) **1-Conf-1**

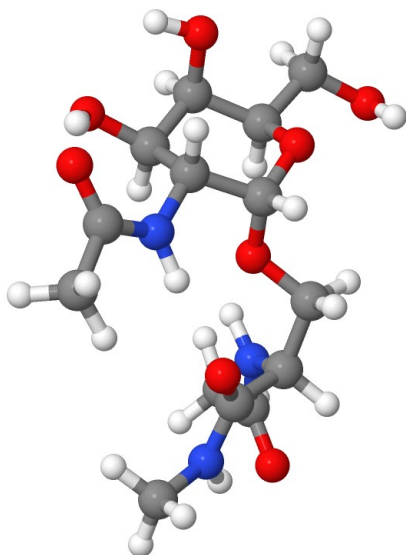

```
C 2.61821 -0.47097 -0.92078
C 1.43462 -2.52132 -0.13768
O 0.94880 -1.78730 0.99484
C 1.98832 0.27321 0.26045
H 1.97218 -0.36784 -1.80199
H 0.71484 -2.43258 -0.96253
C 2.76883 -1.95990 -0.60167
H 3.07550 -2.48733 -1.51556
H 2.69495 0.26362 1.09750
C 0.71430 -0.42403 0.74208
H 0.37736 -0.00267 1.69618
C 1.50459 -3.97122 0.29750
H 1.91536 -4.57362 -0.51657
H 2.15234 -4.07081 1.17578
O 0.20744 -4.48505 0.57720
H -0.15976 -3.97841 1.32025
O 3.73411 -2.15208 0.42214
H 4.50585 -1.60831 0.18353
O 3.90935 0.04514 -1.22543
H 4.08586 0.83170 -0.66938
N 1.67912 1.66047 -0.05367
H 0.73763 1.88606 -0.37910
C 2.58811 2.64359 0.04321
O 3.78083 2.40527 0.32578
C 2.10804 4.04793 -0.18808
H 1.08538 4.08470 -0.56794
H 2.15737 4.58688 0.76370
H 2.78386 4.54079 -0.89134
O -0.26637 -0.23410 -0.24358
```

|   |          |          |          |
|---|----------|----------|----------|
| C | -1.55364 | -0.72823 | 0.10177  |
| H | -1.73967 | -1.66760 | -0.43129 |
| H | -1.61554 | -0.91388 | 1.18092  |
| C | -2.58973 | 0.32754  | -0.29584 |
| H | -2.47307 | 0.56771  | -1.35613 |
| C | -3.98343 | -0.22558 | -0.01725 |
| O | -4.47953 | -0.12949 | 1.11649  |
| N | -4.59711 | -0.83624 | -1.03071 |
| H | -4.14038 | -0.86879 | -1.93516 |
| C | -5.89163 | -1.47750 | -0.86101 |
| H | -5.83551 | -2.25614 | -0.09588 |
| H | -6.64619 | -0.74423 | -0.56497 |
| H | -6.17864 | -1.92577 | -1.81087 |
| N | -2.41928 | 1.54167  | 0.47785  |
| H | -2.87001 | 1.57099  | 1.38787  |
| C | -1.66062 | 2.57925  | 0.08751  |
| O | -1.06835 | 2.59672  | -1.00766 |
| C | -1.53463 | 3.72303  | 1.05648  |
| H | -1.67180 | 4.66227  | 0.51528  |
| H | -0.51759 | 3.71357  | 1.46418  |
| H | -2.24773 | 3.66069  | 1.88071  |

**b) 1-Conf-2**

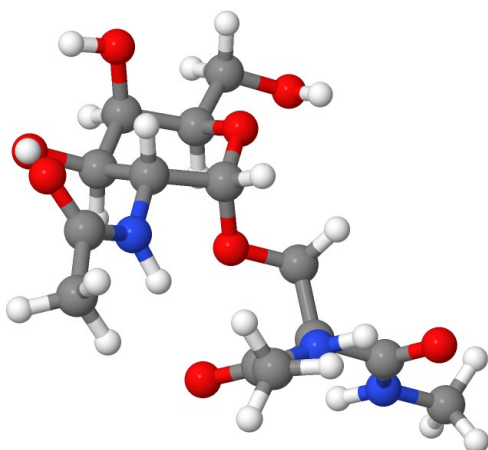

|   |         |          |          |
|---|---------|----------|----------|
| C | 2.61821 | -0.47097 | -0.92078 |
| C | 1.43462 | -2.52132 | -0.13768 |
| O | 0.94880 | -1.78730 | 0.99484  |
| C | 1.98832 | 0.27321  | 0.26045  |
| H | 1.97218 | -0.36784 | -1.80199 |
| H | 0.71484 | -2.43258 | -0.96253 |
| C | 2.76883 | -1.95990 | -0.60167 |
| H | 3.07550 | -2.48733 | -1.51556 |
| H | 2.69495 | 0.26362  | 1.09750  |
| C | 0.71430 | -0.42403 | 0.74208  |
| H | 0.37736 | -0.00267 | 1.69618  |
| C | 1.50459 | -3.97122 | 0.29750  |
| H | 1.91536 | -4.57362 | -0.51657 |
| H | 2.15234 | -4.07081 | 1.17578  |

|   |          |          |          |
|---|----------|----------|----------|
| O | 0.20744  | -4.48505 | 0.57720  |
| H | -0.15976 | -3.97841 | 1.32025  |
| O | 3.73411  | -2.15208 | 0.42214  |
| H | 4.50585  | -1.60831 | 0.18353  |
| O | 3.90935  | 0.04514  | -1.22543 |
| H | 4.08586  | 0.83170  | -0.66938 |
| N | 1.67912  | 1.66047  | -0.05367 |
| H | 0.73763  | 1.88606  | -0.37910 |
| C | 2.58811  | 2.64359  | 0.04321  |
| O | 3.78083  | 2.40527  | 0.32578  |
| C | 2.10804  | 4.04793  | -0.18808 |
| H | 1.08538  | 4.08470  | -0.56794 |
| H | 2.15737  | 4.58688  | 0.76370  |
| H | 2.78386  | 4.54079  | -0.89134 |
| O | -0.26637 | -0.23410 | -0.24358 |
| C | -1.55364 | -0.72823 | 0.10177  |
| H | -1.73967 | -1.66760 | -0.43129 |
| H | -1.61554 | -0.91388 | 1.18092  |
| C | -2.58973 | 0.32754  | -0.29584 |
| H | -2.47307 | 0.56771  | -1.35613 |
| C | -3.98343 | -0.22558 | -0.01725 |
| O | -4.47953 | -0.12949 | 1.11649  |
| N | -4.59711 | -0.83624 | -1.03071 |
| H | -4.14038 | -0.86879 | -1.93516 |
| C | -5.89163 | -1.47750 | -0.86101 |
| H | -5.83551 | -2.25614 | -0.09588 |
| H | -6.64619 | -0.74423 | -0.56497 |
| H | -6.17864 | -1.92577 | -1.81087 |
| N | -2.41928 | 1.54167  | 0.47785  |
| H | -2.87001 | 1.57099  | 1.38787  |
| C | -1.66062 | 2.57925  | 0.08751  |
| O | -1.06835 | 2.59672  | -1.00766 |
| C | -1.53463 | 3.72303  | 1.05648  |
| H | -1.67180 | 4.66227  | 0.51528  |
| H | -0.51759 | 3.71357  | 1.46418  |
| H | -2.24773 | 3.66069  | 1.88071  |

c) **1-Conf-5**

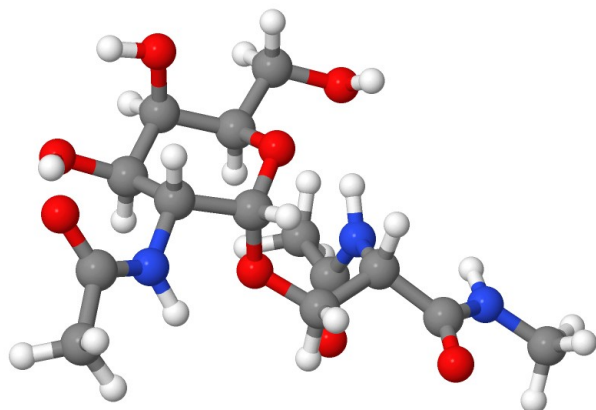

|   |          |          |          |
|---|----------|----------|----------|
| C | 2.66369  | 0.75780  | 0.67137  |
| C | 0.65372  | 1.96072  | -0.18364 |
| O | 0.46649  | 0.93054  | -1.16051 |
| C | 2.36741  | -0.33550 | -0.35888 |
| H | 2.17382  | 0.50744  | 1.62129  |
| H | 0.10315  | 1.69791  | 0.73037  |
| C | 2.12208  | 2.10321  | 0.18378  |
| H | 2.21104  | 2.83580  | 0.99807  |
| H | 2.93993  | -0.12380 | -1.26883 |
| C | 0.88503  | -0.34874 | -0.74831 |
| H | 0.72817  | -1.00379 | -1.61252 |
| C | 0.06573  | 3.22761  | -0.77674 |
| H | 0.13200  | 4.03050  | -0.03768 |
| H | 0.61769  | 3.52280  | -1.67422 |
| O | -1.31530 | 3.05588  | -1.09032 |
| H | -1.37581 | 2.60820  | -1.94999 |
| O | 2.84801  | 2.54478  | -0.95397 |
| H | 3.79206  | 2.43441  | -0.74251 |
| O | 4.06207  | 0.90457  | 0.88859  |
| H | 4.54254  | 0.19811  | 0.40837  |
| N | 2.72907  | -1.66745 | 0.10469  |
| H | 1.98618  | -2.25316 | 0.47444  |
| C | 3.97659  | -2.15767 | 0.03418  |
| O | 4.93308  | -1.45151 | -0.34585 |
| C | 4.17402  | -3.59434 | 0.42269  |
| H | 4.47427  | -4.15170 | -0.47007 |
| H | 4.98825  | -3.65482 | 1.14897  |
| H | 3.27189  | -4.04440 | 0.84067  |
| O | 0.15168  | -0.81943 | 0.35373  |
| C | -1.03361 | -1.53968 | 0.03715  |
| H | -1.34469 | -2.01782 | 0.96589  |
| H | -0.80749 | -2.31210 | -0.70440 |
| C | -2.14862 | -0.62952 | -0.50739 |
| H | -1.88097 | -0.32060 | -1.52447 |
| C | -3.44110 | -1.43600 | -0.64345 |
| O | -3.39161 | -2.65499 | -0.87728 |
| N | -4.59268 | -0.76571 | -0.56736 |
| H | -4.57057 | 0.21411  | -0.31067 |
| C | -5.87160 | -1.44165 | -0.71053 |
| H | -5.94468 | -1.91737 | -1.69178 |
| H | -6.66407 | -0.70107 | -0.61152 |
| H | -5.99440 | -2.20632 | 0.06175  |
| N | -2.31390 | 0.59513  | 0.25117  |
| H | -1.99381 | 1.46280  | -0.18143 |
| C | -2.56938 | 0.60390  | 1.57593  |
| O | -2.86258 | -0.43159 | 2.19411  |
| C | -2.48932 | 1.93955  | 2.26528  |
| H | -1.67250 | 1.90082  | 2.99290  |
| H | -3.42045 | 2.11344  | 2.81125  |
| H | -2.31169 | 2.76270  | 1.56995  |

d) 1-Conf-6

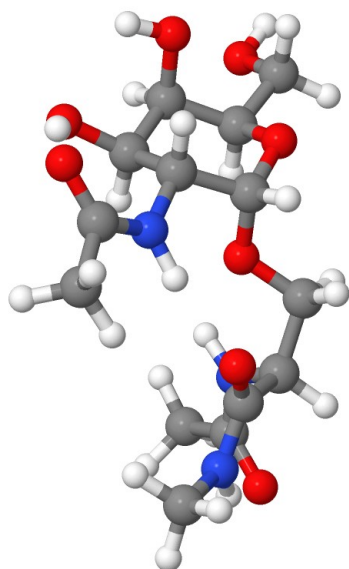

|   |          |          |          |
|---|----------|----------|----------|
| C | -2.14709 | 0.50348  | 1.00125  |
| C | -2.51746 | -1.59711 | -0.31819 |
| O | -2.05972 | -0.91903 | -1.49280 |
| C | -1.62371 | 1.14660  | -0.28558 |
| H | -1.30695 | 0.07112  | 1.56004  |
| H | -1.66979 | -2.08986 | 0.17629  |
| C | -3.13818 | -0.61423 | 0.66498  |
| H | -3.38389 | -1.14975 | 1.59148  |
| H | -2.45152 | 1.66171  | -0.78609 |
| C | -1.09504 | 0.07334  | -1.23990 |
| H | -0.86036 | 0.51259  | -2.21567 |
| C | -3.49177 | -2.65128 | -0.81490 |
| H | -4.32113 | -2.17026 | -1.34526 |
| H | -2.96727 | -3.31791 | -1.50898 |
| O | -3.96316 | -3.36919 | 0.31818  |
| H | -4.59832 | -4.03619 | 0.01438  |
| O | -4.31583 | -0.06834 | 0.08860  |
| H | -4.56276 | 0.69784  | 0.63653  |
| O | -2.83229 | 1.44197  | 1.82208  |
| H | -2.65121 | 2.34900  | 1.49384  |
| N | -0.54267 | 2.10249  | -0.07009 |
| H | 0.39963  | 1.81551  | -0.34458 |
| C | -0.74964 | 3.36695  | 0.32109  |
| O | -1.88078 | 3.77153  | 0.66689  |
| C | 0.43874  | 4.28528  | 0.33118  |
| H | 0.53634  | 4.72393  | 1.32774  |
| H | 1.36515  | 3.77458  | 0.06133  |
| H | 0.25270  | 5.09701  | -0.37853 |
| O | 0.06192  | -0.45394 | -0.65379 |
| C | 0.97520  | -1.07683 | -1.54979 |
| H | 0.98607  | -0.54833 | -2.50853 |
| H | 0.69193  | -2.12202 | -1.71503 |
| C | 2.34684  | -1.00750 | -0.90951 |



|   |         |          |          |
|---|---------|----------|----------|
| H | 3.05628 | -1.55071 | -1.54373 |
| C | 2.83827 | 0.44787  | -0.80205 |
| O | 2.16964 | 1.40299  | -1.23215 |
| N | 4.03597 | 0.61281  | -0.23741 |
| H | 4.55510 | -0.21201 | 0.05363  |
| C | 4.61793 | 1.93451  | -0.06789 |
| H | 3.96511 | 2.56542  | 0.54142  |
| H | 4.76943 | 2.41774  | -1.03703 |
| H | 5.57888 | 1.82425  | 0.43267  |
| N | 2.30938 | -1.66748 | 0.38869  |
| H | 1.42959 | -1.65287 | 0.89573  |
| C | 3.37141 | -2.28504 | 0.93698  |
| O | 4.48707 | -2.27187 | 0.38586  |
| C | 3.15221 | -2.98632 | 2.24765  |
| H | 3.84720 | -2.57310 | 2.98373  |
| H | 2.12953 | -2.88800 | 2.61555  |
| H | 3.39061 | -4.04567 | 2.11585  |

e) **1-Conf-7**

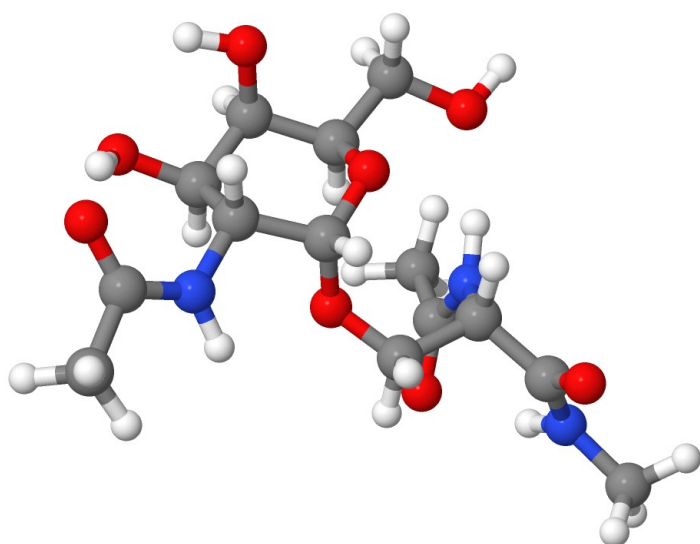

|   |          |          |          |
|---|----------|----------|----------|
| C | 2.64114  | 0.67222  | 0.68753  |
| C | 0.71917  | 1.97029  | -0.22752 |
| O | 0.49995  | 0.93833  | -1.19633 |
| C | 2.31643  | -0.41469 | -0.34039 |
| H | 2.11380  | 0.45770  | 1.62614  |
| H | 0.13449  | 1.75129  | 0.67669  |
| C | 2.18388  | 2.03846  | 0.17369  |
| H | 2.29193  | 2.77326  | 0.98345  |
| H | 2.92119  | -0.23967 | -1.23710 |
| C | 0.84636  | -0.35661 | -0.76954 |
| H | 0.68030  | -1.00629 | -1.63596 |
| C | 0.22331  | 3.26071  | -0.84158 |
| H | 0.43488  | 4.08559  | -0.15109 |
| H | 0.73469  | 3.44671  | -1.79198 |
| O | -1.18026 | 3.13182  | -1.05678 |
| H | -1.51344 | 3.94590  | -1.46564 |

|   |          |          |          |
|---|----------|----------|----------|
| O | 2.95690  | 2.43103  | -0.95045 |
| H | 3.88948  | 2.27930  | -0.71550 |
| O | 4.03882  | 0.74787  | 0.94277  |
| H | 4.49632  | 0.02213  | 0.46929  |
| N | 2.60149  | -1.75791 | 0.14278  |
| H | 1.82482  | -2.30018 | 0.50950  |
| C | 3.82521  | -2.30837 | 0.10460  |
| O | 4.82177  | -1.65523 | -0.26694 |
| C | 3.94654  | -3.74489 | 0.52339  |
| H | 3.00383  | -4.15781 | 0.88597  |
| H | 4.70724  | -3.82045 | 1.30467  |
| H | 4.28830  | -4.32573 | -0.33861 |
| O | 0.06082  | -0.79138 | 0.31322  |
| C | -1.16145 | -1.42438 | -0.03782 |
| H | -1.52268 | -1.89605 | 0.87589  |
| H | -0.97997 | -2.19799 | -0.79355 |
| C | -2.20271 | -0.43681 | -0.59758 |
| H | -1.85105 | -0.08265 | -1.56892 |
| C | -3.48313 | -1.21637 | -0.90299 |
| O | -3.57878 | -1.81367 | -1.98906 |
| N | -4.44060 | -1.25132 | 0.02553  |
| H | -4.24098 | -0.86096 | 0.94260  |
| C | -5.65596 | -2.02315 | -0.17824 |
| H | -6.18155 | -1.67448 | -1.07046 |
| H | -5.42851 | -3.08650 | -0.29747 |
| H | -6.29823 | -1.88776 | 0.69076  |
| N | -2.36075 | 0.76024  | 0.21744  |
| H | -2.07318 | 1.63014  | -0.23242 |
| C | -2.50280 | 0.78498  | 1.55599  |
| O | -2.77603 | -0.23467 | 2.21542  |
| C | -2.34170 | 2.12121  | 2.22976  |
| H | -3.24922 | 2.33937  | 2.79951  |
| H | -1.50959 | 2.04711  | 2.93688  |
| H | -2.14525 | 2.93268  | 1.52654  |

f) **1-Conf-8**

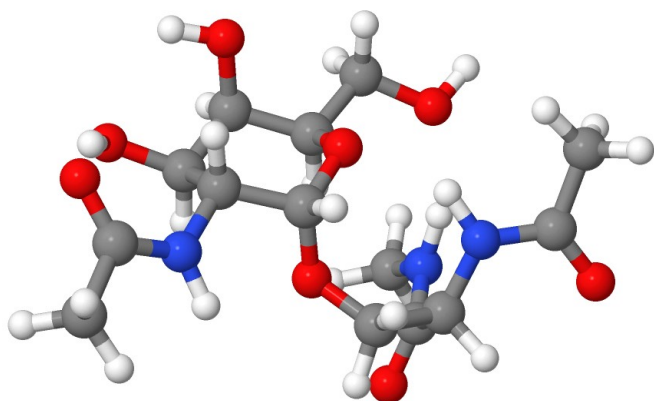

|   |          |         |         |
|---|----------|---------|---------|
| C | 2.31502  | 0.96336 | 0.78680 |
| C | -0.00860 | 1.65342 | 0.19881 |

|   |          |          |          |
|---|----------|----------|----------|
| O | 0.04166  | 0.78875  | -0.94748 |
| C | 2.27785  | 0.02689  | -0.42246 |
| H | 1.97914  | 0.42219  | 1.68083  |
| H | -0.39949 | 1.09168  | 1.05812  |
| C | 1.38121  | 2.15272  | 0.55843  |
| H | 1.31348  | 2.73188  | 1.48953  |
| H | 2.69666  | 0.55419  | -1.28661 |
| C | 0.84140  | -0.36101 | -0.78588 |
| H | 0.82204  | -0.86857 | -1.75582 |
| C | -0.96083 | 2.77899  | -0.13766 |
| H | -0.64980 | 3.27008  | -1.06575 |
| H | -0.94475 | 3.51066  | 0.67906  |
| O | -2.26360 | 2.22013  | -0.28950 |
| H | -2.86660 | 2.90844  | -0.61243 |
| O | 1.86563  | 2.97143  | -0.49501 |
| H | 2.81305  | 3.11821  | -0.32570 |
| O | 3.62438  | 1.47071  | 1.01471  |
| H | 4.25033  | 1.05870  | 0.38424  |
| N | 3.04734  | -1.19136 | -0.22080 |
| H | 2.54455  | -2.02441 | 0.07091  |
| C | 4.37344  | -1.26007 | -0.42136 |
| O | 5.04113  | -0.24524 | -0.70703 |
| C | 5.02175  | -2.60782 | -0.29049 |
| H | 5.84353  | -2.53346 | 0.42638  |
| H | 4.32246  | -3.38162 | 0.03011  |
| H | 5.44424  | -2.88104 | -1.26208 |
| O | 0.35348  | -1.21523 | 0.21737  |
| C | -0.58705 | -2.21431 | -0.17634 |
| H | -0.39212 | -2.53111 | -1.20663 |
| H | -0.42270 | -3.06008 | 0.49316  |
| C | -2.04161 | -1.76576 | -0.04084 |
| H | -2.66210 | -2.65653 | -0.18128 |
| C | -2.28115 | -1.28951 | 1.39526  |
| O | -2.08435 | -2.07649 | 2.33741  |
| N | -2.67983 | -0.03024 | 1.57342  |
| H | -2.70322 | 0.60380  | 0.77605  |
| C | -2.76065 | 0.54932  | 2.90372  |
| H | -3.52889 | 0.04763  | 3.49771  |
| H | -3.02024 | 1.60319  | 2.80165  |
| H | -1.80141 | 0.46135  | 3.42358  |
| N | -2.41027 | -0.79845 | -1.05220 |
| H | -1.74342 | -0.05731 | -1.27042 |
| C | -3.68348 | -0.66144 | -1.48119 |
| O | -4.59009 | -1.42052 | -1.10397 |
| C | -3.95044 | 0.46445  | -2.44284 |
| H | -4.53976 | 0.07998  | -3.27915 |
| H | -3.03452 | 0.92552  | -2.81705 |
| H | -4.54822 | 1.22317  | -1.92712 |

g) 1-Conf-9

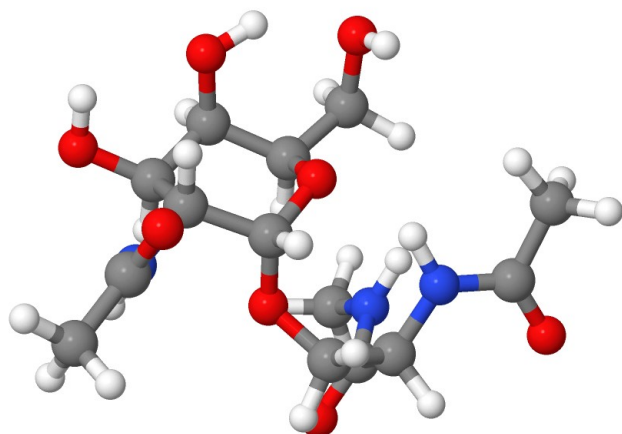

|   |          |          |          |
|---|----------|----------|----------|
| C | 2.15911  | 1.02289  | 1.17208  |
| C | -0.11315 | 1.60474  | 0.31606  |
| O | 0.13957  | 0.83297  | -0.86784 |
| C | 2.33780  | 0.16636  | -0.08507 |
| H | 1.74766  | 0.41369  | 1.98423  |
| H | -0.55682 | 0.96005  | 1.08765  |
| C | 1.19176  | 2.16709  | 0.87432  |
| H | 0.96604  | 2.69548  | 1.81074  |
| H | 2.81940  | 0.77407  | -0.85674 |
| C | 0.98183  | -0.28447 | -0.65047 |
| H | 1.11520  | -0.74629 | -1.63416 |
| C | -1.14357 | 2.66085  | -0.04360 |
| H | -2.06512 | 2.17680  | -0.39010 |
| H | -1.37258 | 3.24654  | 0.85053  |
| O | -0.67345 | 3.58114  | -1.02729 |
| H | -0.63577 | 3.12301  | -1.88363 |
| O | 1.85322  | 3.03937  | -0.03474 |
| H | 1.17143  | 3.56700  | -0.49384 |
| O | 3.40117  | 1.51843  | 1.64002  |
| H | 3.73714  | 2.14886  | 0.97891  |
| N | 3.18991  | -0.97352 | 0.17749  |
| H | 3.10193  | -1.43701 | 1.07582  |
| C | 3.97286  | -1.53262 | -0.76521 |
| O | 4.05391  | -1.06714 | -1.91454 |
| C | 4.76213  | -2.74764 | -0.35844 |
| H | 4.58232  | -3.04550 | 0.67621  |
| H | 5.82568  | -2.53141 | -0.49434 |
| H | 4.49819  | -3.57310 | -1.02530 |
| O | 0.40806  | -1.20098 | 0.24381  |
| C | -0.47593 | -2.17749 | -0.30373 |
| H | -0.30579 | -3.09619 | 0.25993  |
| H | -0.23754 | -2.35668 | -1.35761 |
| C | -1.94968 | -1.79366 | -0.16990 |
| H | -2.53811 | -2.67723 | -0.44075 |
| C | -2.25650 | -1.50715 | 1.30398  |
| O | -2.00192 | -2.37336 | 2.15696  |
| N | -2.78929 | -0.32469 | 1.61517  |

|   |          |          |          |
|---|----------|----------|----------|
| H | -2.90577 | 0.36535  | 0.88178  |
| C | -2.99079 | 0.07544  | 2.99815  |
| H | -3.68835 | -0.60340 | 3.49500  |
| H | -2.04177 | 0.06760  | 3.54287  |
| H | -3.40392 | 1.08335  | 3.00719  |
| N | -2.30327 | -0.71683 | -1.06970 |
| H | -1.58984 | -0.01763 | -1.27552 |
| C | -3.55026 | -0.54274 | -1.55570 |
| O | -4.47735 | -1.31950 | -1.27934 |
| C | -3.76137 | 0.65808  | -2.43820 |
| H | -2.82930 | 1.17155  | -2.68597 |
| H | -4.42761 | 1.35388  | -1.91842 |
| H | -4.25911 | 0.33696  | -3.35690 |

**h) 1-Conf-10**

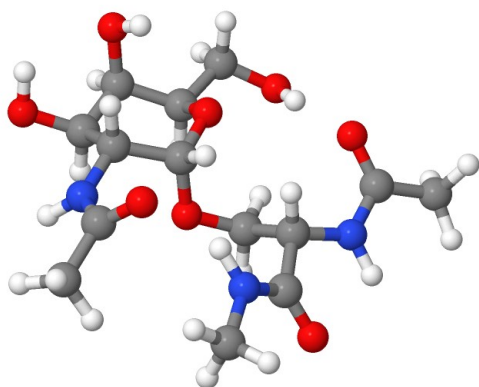

|   |          |          |          |
|---|----------|----------|----------|
| C | 3.05427  | -0.57707 | -0.66096 |
| C | 1.25948  | -2.27568 | -0.41360 |
| O | 0.64219  | -1.43824 | 0.57328  |
| C | 2.26608  | 0.34137  | 0.28317  |
| H | 2.76399  | -0.36421 | -1.69608 |
| H | 0.89296  | -2.00427 | -1.41298 |
| C | 2.76362  | -2.05310 | -0.37343 |
| H | 3.24957  | -2.66075 | -1.14249 |
| H | 2.65879  | 0.22347  | 1.30250  |
| C | 0.78129  | -0.05789 | 0.34653  |
| H | 0.30655  | 0.41152  | 1.20908  |
| C | 0.81224  | -3.68683 | -0.09213 |
| H | 1.32270  | -4.39017 | -0.75530 |
| H | 1.06820  | -3.93104 | 0.94628  |
| O | -0.58258 | -3.84345 | -0.31409 |
| H | -1.07588 | -3.19326 | 0.22504  |
| O | 3.33967  | -2.44693 | 0.86620  |
| H | 2.77604  | -2.12962 | 1.59385  |
| O | 4.44258  | -0.30991 | -0.57319 |
| H | 4.75178  | -0.66650 | 0.27907  |
| N | 2.45534  | 1.71749  | -0.14557 |
| H | 2.99681  | 1.87761  | -0.98880 |
| C | 1.87756  | 2.77366  | 0.44783  |
| O | 1.17732  | 2.65007  | 1.47057  |

|   |          |          |          |
|---|----------|----------|----------|
| C | 2.08168  | 4.11170  | -0.20799 |
| H | 2.20552  | 4.87392  | 0.56406  |
| H | 2.93982  | 4.12056  | -0.88319 |
| H | 1.17973  | 4.34948  | -0.78324 |
| O | 0.16577  | 0.35187  | -0.85448 |
| C | -1.16552 | -0.10686 | -1.03528 |
| H | -1.19817 | -1.20121 | -1.02585 |
| H | -1.47046 | 0.24508  | -2.02439 |
| C | -2.15893 | 0.40915  | 0.02752  |
| H | -1.75369 | 0.25822  | 1.03213  |
| C | -2.46314 | 1.88366  | -0.20041 |
| O | -3.44771 | 2.22711  | -0.87625 |
| N | -1.60430 | 2.75646  | 0.32658  |
| H | -0.78449 | 2.42584  | 0.83247  |
| C | -1.72157 | 4.18431  | 0.07601  |
| H | -0.92968 | 4.69192  | 0.62666  |
| H | -1.62061 | 4.40367  | -0.99097 |
| H | -2.69068 | 4.55294  | 0.42162  |
| N | -3.39303 | -0.34014 | -0.08529 |
| H | -4.16684 | 0.10082  | -0.57369 |
| C | -3.50365 | -1.59956 | 0.36838  |
| O | -2.55999 | -2.17033 | 0.94801  |
| C | -4.82175 | -2.28870 | 0.15423  |
| H | -5.21661 | -2.59566 | 1.12670  |
| H | -5.55148 | -1.65481 | -0.35271 |
| H | -4.64789 | -3.19083 | -0.43931 |

i) **1-Conf-12**

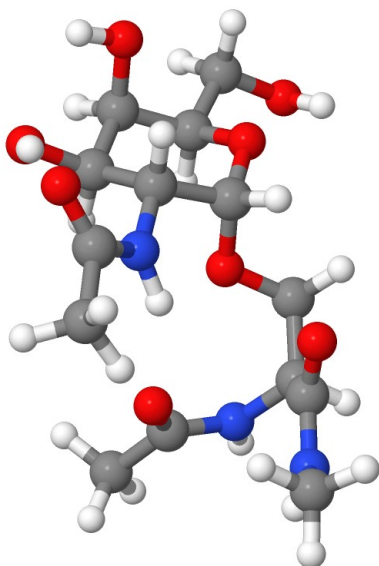

|   |          |          |          |
|---|----------|----------|----------|
| C | -2.06688 | 1.10505  | 0.83003  |
| C | -2.91348 | -1.15336 | 0.18497  |
| O | -2.16446 | -1.07046 | -1.03452 |
| C | -1.22839 | 1.09242  | -0.45050 |
| H | -1.46947 | 0.70426  | 1.65949  |
| H | -2.29239 | -1.62240 | 0.95992  |

|   |          |          |          |
|---|----------|----------|----------|
| C | -3.31345 | 0.23385  | 0.66398  |
| H | -3.81159 | 0.13940  | 1.63893  |
| H | -1.78265 | 1.60917  | -1.24140 |
| C | -0.96706 | -0.33684 | -0.93043 |
| H | -0.53973 | -0.33184 | -1.93848 |
| C | -4.09970 | -2.05134 | -0.10468 |
| H | -4.73232 | -2.11139 | 0.78450  |
| H | -4.68900 | -1.64176 | -0.93278 |
| O | -3.68156 | -3.37795 | -0.40387 |
| H | -3.16120 | -3.34863 | -1.22336 |
| O | -4.19877 | 0.81358  | -0.28352 |
| H | -4.26513 | 1.75930  | -0.06115 |
| O | -2.49489 | 2.42393  | 1.15291  |
| H | -2.05242 | 3.06369  | 0.55744  |
| N | 0.05736  | 1.75360  | -0.28324 |
| H | 0.85441  | 1.17303  | -0.01236 |
| C | 0.21337  | 3.08066  | -0.38198 |
| O | -0.75861 | 3.84487  | -0.56609 |
| C | 1.61162  | 3.61608  | -0.26101 |
| H | 2.35562  | 2.82564  | -0.14568 |
| H | 1.83639  | 4.19966  | -1.15838 |
| H | 1.65582  | 4.29004  | 0.59940  |
| O | -0.07030 | -0.91459 | -0.02433 |
| C | 0.55171  | -2.11434 | -0.46611 |
| H | 0.39983  | -2.25558 | -1.54125 |
| H | 0.10992  | -2.96395 | 0.06544  |
| C | 2.04280  | -2.05645 | -0.16636 |
| H | 2.45615  | -3.04124 | -0.41208 |
| C | 2.77552  | -1.04149 | -1.05386 |
| O | 2.19199  | -0.44254 | -1.96715 |
| N | 4.08989  | -0.91233 | -0.83453 |
| H | 4.48623  | -1.34530 | -0.00789 |
| C | 4.86026  | 0.11218  | -1.52028 |
| H | 4.85031  | -0.06046 | -2.59892 |
| H | 5.88791  | 0.06786  | -1.16190 |
| H | 4.44879  | 1.10681  | -1.31762 |
| N | 2.32168  | -1.83436 | 1.24688  |
| H | 2.42161  | -2.65562 | 1.83263  |
| C | 2.38662  | -0.62417 | 1.83965  |
| O | 2.26883  | 0.43713  | 1.20626  |
| C | 2.63572  | -0.61956 | 3.32340  |
| H | 2.76860  | -1.62140 | 3.73531  |
| H | 1.78514  | -0.13617 | 3.81279  |
| H | 3.52704  | -0.01939 | 3.52530  |

j) **1-Conf-20**

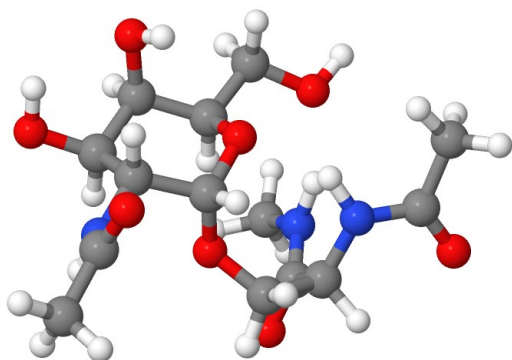

|   |          |          |          |
|---|----------|----------|----------|
| C | 2.29364  | 1.34154  | 0.84756  |
| C | -0.02763 | 1.74976  | 0.00176  |
| O | 0.17594  | 0.72343  | -0.98396 |
| C | 2.40172  | 0.20881  | -0.17787 |
| H | 1.93881  | 0.94037  | 1.80364  |
| H | -0.44567 | 1.29898  | 0.91152  |
| C | 1.30084  | 2.40324  | 0.36028  |
| H | 1.13937  | 3.12561  | 1.16587  |
| H | 2.84979  | 0.60219  | -1.09671 |
| C | 1.01338  | -0.33372 | -0.55086 |
| H | 1.08963  | -1.01488 | -1.40512 |
| C | -1.02333 | 2.73079  | -0.57602 |
| H | -1.12750 | 3.57703  | 0.11368  |
| H | -0.67099 | 3.10007  | -1.54536 |
| O | -2.26444 | 2.04813  | -0.73243 |
| H | -2.88621 | 2.62428  | -1.20414 |
| O | 1.85494  | 3.14378  | -0.72184 |
| H | 1.78525  | 2.62330  | -1.54119 |
| O | 3.55670  | 1.92855  | 1.10168  |
| H | 3.79258  | 2.45509  | 0.31652  |
| N | 3.25811  | -0.85155 | 0.30636  |
| H | 3.19693  | -1.10057 | 1.28826  |
| C | 3.99563  | -1.62931 | -0.50984 |
| O | 4.04046  | -1.44209 | -1.73721 |
| C | 4.78059  | -2.73528 | 0.14185  |
| H | 5.84199  | -2.58109 | -0.07255 |
| H | 4.63147  | -2.78014 | 1.22210  |
| H | 4.48060  | -3.68626 | -0.30696 |
| O | 0.47956  | -1.00185 | 0.56119  |
| C | -0.36038 | -2.12673 | 0.30943  |
| H | -0.20112 | -2.81467 | 1.14157  |
| H | -0.06303 | -2.62052 | -0.62198 |
| C | -1.84637 | -1.77466 | 0.25318  |
| H | -2.39569 | -2.72126 | 0.22934  |
| C | -2.24018 | -1.07556 | 1.55782  |
| O | -2.09517 | -1.67630 | 2.63697  |
| N | -2.70942 | 0.16906  | 1.47725  |
| H | -2.69362 | 0.65191  | 0.57962  |
| C | -2.93315 | 0.96621  | 2.67157  |



|   |          |          |          |
|---|----------|----------|----------|
| H | -2.02096 | 1.02629  | 3.27361  |
| H | -3.72896 | 0.53305  | 3.28303  |
| H | -3.22726 | 1.96933  | 2.36213  |
| N | -2.18180 | -1.02800 | -0.94033 |
| H | -1.53951 | -0.29486 | -1.24326 |
| C | -3.42457 | -1.04845 | -1.46831 |
| O | -4.31805 | -1.78171 | -1.01596 |
| C | -3.67498 | -0.13458 | -2.63710 |
| H | -4.18068 | -0.70091 | -3.42328 |
| H | -2.75784 | 0.30687  | -3.03093 |
| H | -4.34646 | 0.66633  | -2.31061 |

4) Geometries of the conformers of **2**  
a) **2-Conf-15**

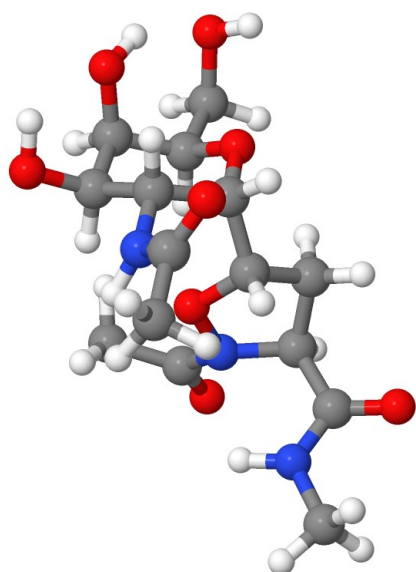

|   |          |          |          |
|---|----------|----------|----------|
| C | -2.87674 | -0.87104 | 0.64459  |
| H | -3.04281 | -1.57293 | 1.47035  |
| C | -1.74300 | 1.29205  | 0.04514  |
| C | -0.97279 | 0.53305  | -1.06405 |
| H | -0.96995 | 1.16439  | -1.95520 |
| O | -1.67687 | -0.63679 | -1.44787 |
| C | -1.96858 | -1.54129 | -0.38386 |
| H | -1.04591 | -1.84474 | 0.12609  |
| C | -2.55912 | -2.79098 | -1.01114 |
| H | -2.78070 | -3.51079 | -0.22218 |
| H | -1.82682 | -3.22955 | -1.69400 |
| H | -2.63639 | 1.71144  | -0.42406 |
| C | -2.20720 | 0.38574  | 1.19320  |
| H | -1.35565 | 0.08913  | 1.80706  |
| C | 0.50295  | 0.28902  | -0.74641 |
| H | 1.03487  | 1.24149  | -0.83972 |
| N | -0.95870 | 2.39354  | 0.57553  |
| H | -0.40196 | 2.22350  | 1.40436  |
| C | -0.77787 | 3.54686  | -0.09450 |

|   |          |          |          |
|---|----------|----------|----------|
| O | -1.34211 | 3.77342  | -1.17103 |
| C | 0.14134  | 4.55617  | 0.53469  |
| H | 0.97220  | 4.73535  | -0.15036 |
| H | 0.52884  | 4.23318  | 1.49982  |
| H | -0.40452 | 5.49343  | 0.65341  |
| O | -3.78517 | -2.54142 | -1.69859 |
| H | -3.58394 | -2.05876 | -2.50943 |
| O | -4.12402 | -0.46288 | 0.09161  |
| H | -4.40029 | -1.13887 | -0.54608 |
| O | -3.09018 | 1.08627  | 2.05445  |
| H | -3.90850 | 1.24544  | 1.56506  |
| O | 0.65918  | -0.16133 | 0.62067  |
| N | 1.77502  | -1.02148 | 0.64873  |
| C | 1.78606  | -1.97368 | 1.62231  |
| O | 2.64831  | -2.85032 | 1.60299  |
| C | 0.75362  | -1.83729 | 2.70021  |
| H | 0.94375  | -2.59100 | 3.46056  |
| H | -0.24310 | -1.97686 | 2.27453  |
| H | 0.78966  | -0.83935 | 3.14029  |
| C | 1.18490  | -0.77974 | -1.58699 |
| H | 1.51871  | -0.39773 | -2.54925 |
| H | 0.52596  | -1.63487 | -1.73735 |
| C | 2.34829  | -1.18677 | -0.68093 |
| H | 2.63362  | -2.23084 | -0.81678 |
| C | 3.60161  | -0.34653 | -0.91693 |
| O | 4.09302  | -0.30396 | -2.04923 |
| N | 4.12641  | 0.28566  | 0.13066  |
| H | 3.67646  | 0.19056  | 1.03058  |
| C | 5.34568  | 1.06831  | 0.00570  |
| H | 5.57938  | 1.49924  | 0.97575  |
| H | 5.21079  | 1.87058  | -0.72073 |
| H | 6.17497  | 0.43730  | -0.31734 |

b) **2-Conf-7**

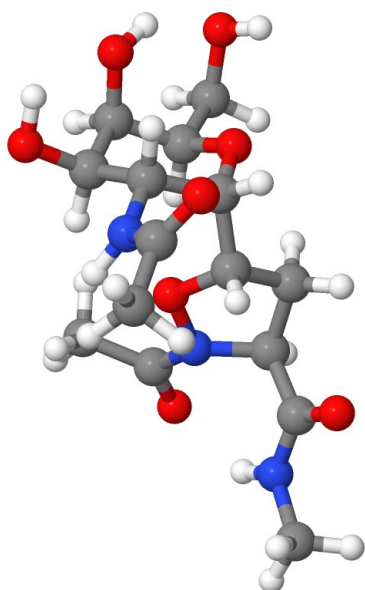

|   |          |          |          |
|---|----------|----------|----------|
| C | -2.87666 | -1.07217 | 0.65692  |
| H | -2.98592 | -1.80094 | 1.46859  |
| C | -1.90916 | 1.17645  | 0.09169  |
| C | -1.09657 | 0.49884  | -1.04064 |
| H | -1.15031 | 1.14563  | -1.91881 |
| O | -1.71426 | -0.71403 | -1.44133 |
| C | -1.93619 | -1.65855 | -0.39378 |
| H | -0.99070 | -1.90942 | 0.10238  |
| C | -2.44839 | -2.93158 | -1.04268 |
| H | -2.60273 | -3.68402 | -0.26827 |
| H | -1.69918 | -3.30011 | -1.74828 |
| H | -2.83761 | 1.53583  | -0.35936 |
| C | -2.28682 | 0.21450  | 1.22546  |
| H | -1.40475 | -0.03608 | 1.81710  |
| C | 0.39421  | 0.36127  | -0.73922 |
| H | 0.85051  | 1.35625  | -0.77640 |
| N | -1.20422 | 2.32174  | 0.64042  |
| H | -0.65308 | 2.18262  | 1.47871  |
| C | -1.08570 | 3.48843  | -0.01980 |
| O | -1.64809 | 3.68660  | -1.10295 |
| C | -0.23216 | 4.54395  | 0.62580  |
| H | 0.63638  | 4.71719  | -0.01311 |
| H | 0.10284  | 4.26356  | 1.62331  |
| H | -0.80420 | 5.47124  | 0.67542  |
| O | -3.70230 | -2.75703 | -1.70278 |
| H | -3.55482 | -2.23135 | -2.49828 |
| O | -4.15459 | -0.73582 | 0.12666  |
| H | -4.40270 | -1.42666 | -0.50644 |
| O | -3.20000 | 0.83124  | 2.11850  |
| H | -4.03727 | 0.94156  | 1.64825  |
| O | 0.57933  | -0.16068 | 0.59359  |
| N | 1.82936  | -0.80225 | 0.59487  |
| C | 2.08734  | -1.64694 | 1.61902  |
| O | 3.11609  | -2.32974 | 1.59123  |
| C | 1.10119  | -1.65558 | 2.74628  |
| H | 1.46340  | -2.32480 | 3.52295  |
| H | 0.12948  | -1.99511 | 2.37812  |
| H | 0.97226  | -0.64859 | 3.14692  |
| C | 1.16364  | -0.60251 | -1.62979 |
| H | 1.44953  | -0.14805 | -2.57542 |
| H | 0.57996  | -1.50488 | -1.81185 |
| C | 2.36898  | -0.94229 | -0.76290 |
| H | 2.70255  | -1.97318 | -0.89423 |
| C | 3.57537  | -0.01502 | -0.96319 |
| O | 3.58833  | 0.87277  | -1.81784 |
| N | 4.60502  | -0.26198 | -0.15036 |
| H | 4.51202  | -1.00577 | 0.53285  |
| C | 5.81632  | 0.54113  | -0.19520 |
| H | 5.59397  | 1.58729  | 0.02116  |
| H | 6.28179  | 0.47785  | -1.17981 |
| H | 6.50901  | 0.16118  | 0.55147  |

c) 2-Conf-18

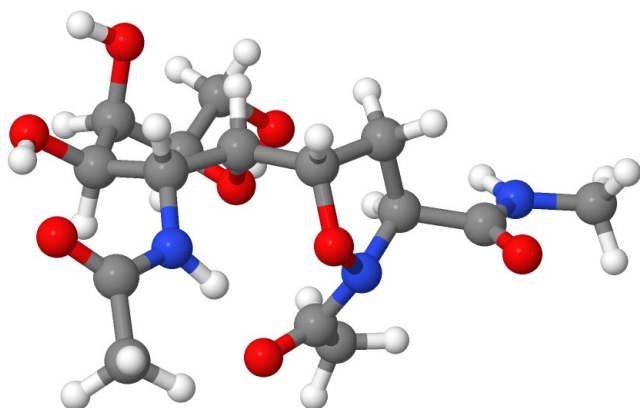

|   |          |          |          |
|---|----------|----------|----------|
| C | 2.36987  | 2.23550  | 0.28735  |
| H | 2.94291  | 2.81663  | 1.01632  |
| C | 2.17788  | -0.09792 | -0.74963 |
| C | 0.75317  | 0.44643  | -0.88700 |
| H | 0.80650  | 1.29483  | -1.57687 |
| O | 0.30058  | 0.89262  | 0.38562  |
| C | 0.93536  | 2.10521  | 0.81084  |
| H | 0.98792  | 2.02890  | 1.90085  |
| C | 0.06795  | 3.29657  | 0.44261  |
| H | -0.11830 | 3.30865  | -0.63265 |
| H | 0.58411  | 4.22218  | 0.71751  |
| H | 2.64128  | -0.10683 | -1.74014 |
| C | 2.99945  | 0.85400  | 0.16662  |
| H | 3.02021  | 0.41599  | 1.17171  |
| C | -0.29658 | -0.47328 | -1.49655 |
| H | 0.06844  | -0.84215 | -2.45505 |
| N | 2.19024  | -1.45959 | -0.22288 |
| H | 1.35438  | -1.81323 | 0.23622  |
| C | 3.31929  | -2.17049 | -0.14174 |
| O | 4.40722  | -1.72851 | -0.55501 |
| C | 3.21839  | -3.54239 | 0.45988  |
| H | 3.91579  | -3.60641 | 1.29669  |
| H | 3.52578  | -4.27200 | -0.29165 |
| H | 2.21041  | -3.77390 | 0.80196  |
| O | -1.20679 | 3.21834  | 1.06961  |
| H | -1.07655 | 3.23323  | 2.02544  |
| O | 2.38490  | 2.91337  | -0.96613 |
| H | 3.29748  | 2.90530  | -1.28139 |
| O | 4.31994  | 1.04071  | -0.31759 |
| H | 4.66013  | 0.15179  | -0.51696 |
| O | -0.58677 | -1.64848 | -0.71781 |
| N | -1.52377 | -1.25546 | 0.24843  |
| C | -1.07232 | -1.32563 | 1.53716  |
| O | -0.03621 | -1.92039 | 1.81583  |
| C | -1.94737 | -0.67557 | 2.56678  |
| H | -1.73704 | -1.12449 | 3.53520  |
| H | -3.00772 | -0.77121 | 2.33236  |

|   |          |          |          |
|---|----------|----------|----------|
| H | -1.69393 | 0.38937  | 2.60465  |
| C | -1.66249 | 0.20448  | -1.60773 |
| H | -2.21360 | -0.21976 | -2.44689 |
| H | -1.58671 | 1.28403  | -1.72813 |
| C | -2.34873 | -0.16080 | -0.27304 |
| H | -2.31553 | 0.68242  | 0.41518  |
| C | -3.78530 | -0.60841 | -0.51323 |
| O | -4.05142 | -1.74076 | -0.92159 |
| N | -4.71219 | 0.32921  | -0.30672 |
| H | -4.42725 | 1.22734  | 0.05986  |
| C | -6.11838 | 0.07818  | -0.58096 |
| H | -6.26152 | -0.18469 | -1.62989 |
| H | -6.67931 | 0.98214  | -0.35809 |
| H | -6.49052 | -0.73772 | 0.04030  |

d) **2-Conf-9**

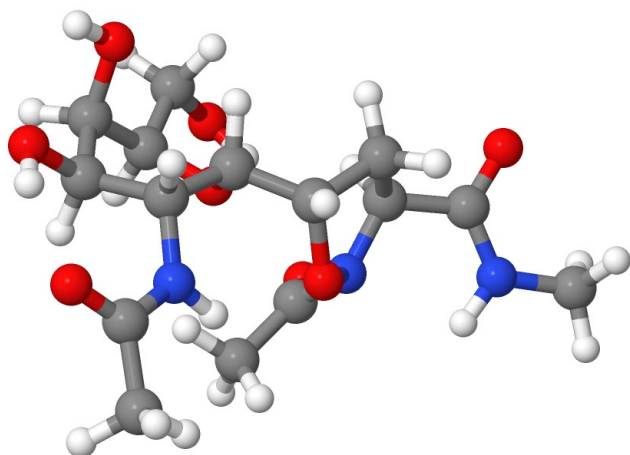

|   |          |          |          |
|---|----------|----------|----------|
| C | 2.58545  | 2.02902  | 0.08694  |
| H | 3.24335  | 2.61155  | 0.73986  |
| C | 2.17263  | -0.34155 | -0.77422 |
| C | 0.78751  | 0.29734  | -0.91811 |
| H | 0.86522  | 1.05523  | -1.70250 |
| O | 0.39451  | 0.89966  | 0.30718  |
| C | 1.20477  | 2.00636  | 0.73219  |
| H | 1.35464  | 1.85859  | 1.80644  |
| C | 0.41346  | 3.28168  | 0.52319  |
| H | 0.09657  | 3.35022  | -0.52285 |
| H | 1.02886  | 4.15044  | 0.76368  |
| H | 2.58043  | -0.48311 | -1.77956 |
| C | 3.12610  | 0.60836  | 0.00184  |
| H | 3.21352  | 0.23420  | 1.02909  |
| C | -0.31881 | -0.66352 | -1.34846 |
| H | 0.07398  | -1.35001 | -2.09862 |
| N | 2.09197  | -1.64936 | -0.12783 |
| H | 1.22110  | -1.93772 | 0.30177  |
| C | 3.16740  | -2.43830 | -0.00504 |
| O | 4.27752  | -2.09665 | -0.44644 |
| C | 2.97573  | -3.76159 | 0.67767  |

|   |          |          |          |
|---|----------|----------|----------|
| H | 1.96213  | -3.89790 | 1.05272  |
| H | 3.68654  | -3.83237 | 1.50232  |
| H | 3.20846  | -4.55320 | -0.03709 |
| O | -0.71550 | 3.31969  | 1.39038  |
| H | -1.19059 | 2.48165  | 1.30877  |
| O | 2.52894  | 2.64484  | -1.19509 |
| H | 3.41557  | 2.59766  | -1.57459 |
| O | 4.40453  | 0.68277  | -0.60604 |
| H | 4.69235  | -0.23761 | -0.72490 |
| O | -0.77767 | -1.49672 | -0.25995 |
| N | -1.79263 | -0.77062 | 0.39719  |
| C | -1.53946 | -0.40486 | 1.69959  |
| O | -2.21119 | 0.48749  | 2.20432  |
| C | -0.50486 | -1.18471 | 2.45003  |
| H | 0.47250  | -0.74133 | 2.24223  |
| H | -0.48376 | -2.23053 | 2.14597  |
| H | -0.71525 | -1.10117 | 3.51455  |
| C | -1.59666 | 0.02048  | -1.82314 |
| H | -2.12207 | -0.63337 | -2.51993 |
| H | -1.40686 | 0.97860  | -2.30213 |
| C | -2.40752 | 0.18397  | -0.52661 |
| H | -2.30169 | 1.19192  | -0.12257 |
| C | -3.89061 | -0.03848 | -0.76637 |
| O | -4.49364 | 0.74000  | -1.51430 |
| N | -4.47311 | -1.07387 | -0.16710 |
| H | -3.91603 | -1.65297 | 0.44594  |
| C | -5.88837 | -1.35412 | -0.35025 |
| H | -6.49347 | -0.51490 | -0.00423 |
| H | -6.14110 | -2.23997 | 0.22662  |
| H | -6.10851 | -1.53603 | -1.40290 |

e) **2-Conf-17**

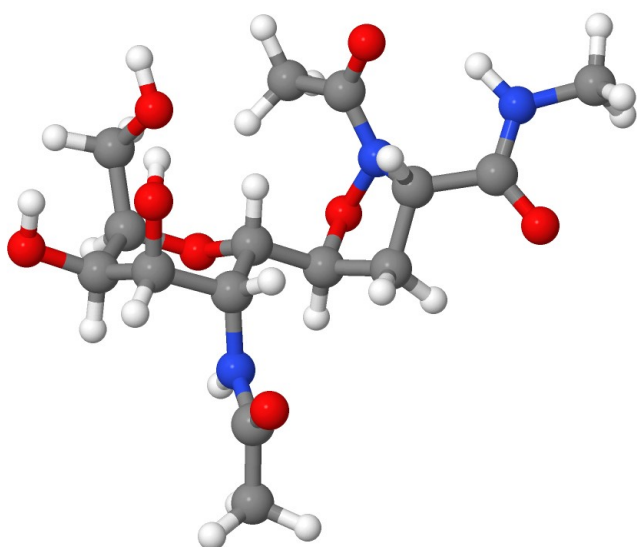

|   |         |          |          |
|---|---------|----------|----------|
| C | 3.43612 | -0.82501 | 0.03291  |
| H | 3.95922 | -0.13715 | -0.63582 |
| C | 1.57922 | 0.82961  | 0.40504  |

|   |          |          |          |
|---|----------|----------|----------|
| C | 0.68648  | -0.10119 | -0.41139 |
| H | 0.21029  | -0.80069 | 0.28461  |
| O | 1.45233  | -0.82338 | -1.37870 |
| C | 2.49727  | -1.65875 | -0.86738 |
| H | 3.08132  | -1.93348 | -1.74949 |
| C | 2.00201  | -2.98752 | -0.32166 |
| H | 2.87418  | -3.60466 | -0.08936 |
| H | 1.42963  | -3.48509 | -1.10935 |
| H | 0.99281  | 1.28492  | 1.20336  |
| C | 2.71760  | 0.03528  | 1.07342  |
| H | 3.43739  | 0.75079  | 1.47822  |
| C | -0.38857 | 0.63442  | -1.20463 |
| H | 0.05220  | 1.12816  | -2.06982 |
| N | 2.10775  | 1.89118  | -0.43566 |
| H | 2.33538  | 1.68001  | -1.39956 |
| C | 2.40018  | 3.11517  | 0.04468  |
| O | 2.20150  | 3.41918  | 1.22589  |
| C | 2.97701  | 4.09974  | -0.93323 |
| H | 2.33489  | 4.98175  | -0.95443 |
| H | 3.06982  | 3.68965  | -1.93778 |
| H | 3.95982  | 4.40737  | -0.57174 |
| O | 1.18791  | -2.82475 | 0.84082  |
| H | 1.00503  | -3.69412 | 1.21556  |
| O | 4.43303  | -1.63273 | 0.63111  |
| H | 4.05059  | -2.05301 | 1.41311  |
| O | 2.25191  | -0.71702 | 2.17999  |
| H | 1.77665  | -1.50892 | 1.86316  |
| O | -1.33202 | -0.31372 | -1.74758 |
| N | -2.20761 | -0.59683 | -0.68954 |
| C | -2.23477 | -1.88009 | -0.22042 |
| O | -2.83535 | -2.11466 | 0.82777  |
| C | -1.59779 | -2.93134 | -1.07343 |
| H | -2.16447 | -3.03448 | -2.00192 |
| H | -1.60620 | -3.87342 | -0.52982 |
| H | -0.58019 | -2.64390 | -1.33670 |
| C | -1.29597 | 1.55152  | -0.39249 |
| H | -1.80303 | 2.23332  | -1.07371 |
| H | -0.78461 | 2.13361  | 0.37066  |
| C | -2.30404 | 0.57010  | 0.20950  |
| H | -2.00536 | 0.24683  | 1.21131  |
| C | -3.72502 | 1.12982  | 0.31073  |
| O | -3.96040 | 2.32691  | 0.13170  |
| N | -4.66734 | 0.24484  | 0.64063  |
| H | -4.38801 | -0.71345 | 0.81989  |
| C | -6.05430 | 0.64802  | 0.80715  |
| H | -6.14904 | 1.38644  | 1.60512  |
| H | -6.64000 | -0.23142 | 1.06262  |
| H | -6.44179 | 1.07942  | -0.11685 |

f) 2-Conf-3

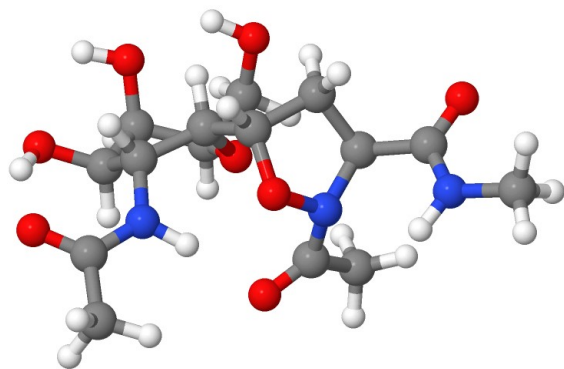

|   |          |          |          |
|---|----------|----------|----------|
| C | 2.68754  | 1.81510  | 0.51600  |
| H | 3.37043  | 2.20517  | 1.27693  |
| C | 2.06176  | -0.33335 | -0.73166 |
| C | 0.76382  | 0.47580  | -0.79659 |
| H | 0.96881  | 1.34482  | -1.42831 |
| O | 0.38811  | 0.90843  | 0.50595  |
| C | 1.27389  | 1.86604  | 1.09895  |
| H | 1.36213  | 1.57791  | 2.15068  |
| C | 0.64209  | 3.25079  | 1.05507  |
| H | 1.32921  | 3.96806  | 1.51872  |
| H | -0.28027 | 3.23141  | 1.63805  |
| H | 2.49317  | -0.35721 | -1.73644 |
| C | 3.07442  | 0.37541  | 0.21198  |
| H | 3.07721  | -0.16476 | 1.16628  |
| C | -0.43407 | -0.20383 | -1.44771 |
| H | -0.13737 | -0.57929 | -2.42703 |
| N | 1.83189  | -1.70872 | -0.30018 |
| H | 0.95211  | -1.94055 | 0.15349  |
| C | 2.82007  | -2.60972 | -0.30326 |
| O | 3.96041  | -2.33114 | -0.71648 |
| C | 2.49193  | -3.98565 | 0.20021  |
| H | 2.63854  | -4.69573 | -0.61591 |
| H | 3.19124  | -4.23986 | 0.99814  |
| H | 1.46961  | -4.06102 | 0.56847  |
| O | 0.27937  | 3.66092  | -0.25692 |
| H | 1.08314  | 3.63079  | -0.79349 |
| O | 2.78161  | 2.63322  | -0.65047 |
| H | 3.67037  | 2.52804  | -1.01326 |
| O | 4.37972  | 0.40314  | -0.34180 |
| H | 4.56642  | -0.50897 | -0.62067 |
| O | -0.92765 | -1.35273 | -0.72938 |
| N | -1.77780 | -0.85248 | 0.26851  |
| C | -1.32559 | -1.05462 | 1.54930  |
| O | -0.41465 | -1.83980 | 1.77980  |
| C | -2.04764 | -0.29628 | 2.62172  |
| H | -3.10920 | -0.17360 | 2.40688  |
| H | -1.59168 | 0.69686  | 2.69480  |
| H | -1.91391 | -0.81810 | 3.56687  |
| C | -1.66028 | 0.70485  | -1.51449 |



|   |          |          |          |
|---|----------|----------|----------|
| H | -2.27631 | 0.42754  | -2.36991 |
| H | -1.39801 | 1.75839  | -1.58295 |
| C | -2.40330 | 0.39141  | -0.19628 |
| H | -2.24202 | 1.18521  | 0.53299  |
| C | -3.90043 | 0.28215  | -0.43797 |
| O | -4.52413 | 1.30053  | -0.75761 |
| N | -4.46659 | -0.91669 | -0.32331 |
| H | -3.89390 | -1.69319 | -0.02221 |
| C | -5.88957 | -1.10498 | -0.55747 |
| H | -6.12627 | -2.15582 | -0.41210 |
| H | -6.47617 | -0.50443 | 0.13937  |
| H | -6.14994 | -0.81568 | -1.57637 |

g) **2-Conf-6**

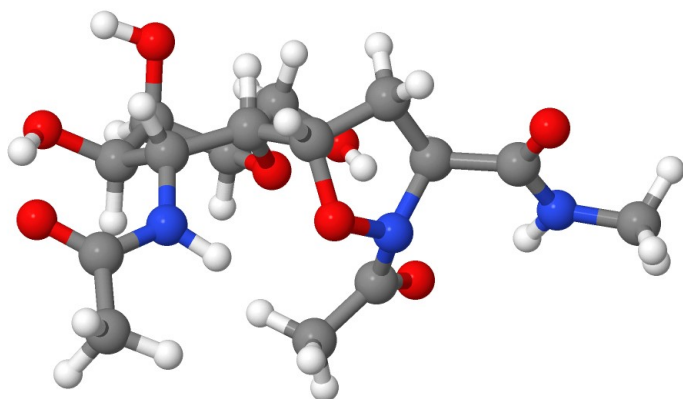

|   |          |          |          |
|---|----------|----------|----------|
| C | 2.45769  | 2.14878  | 0.13917  |
| H | 3.03731  | 2.78088  | 0.81938  |
| C | 2.24210  | -0.24890 | -0.71109 |
| C | 0.82576  | 0.29507  | -0.93025 |
| H | 0.89108  | 1.05041  | -1.71858 |
| O | 0.33862  | 0.88200  | 0.26878  |
| C | 1.03692  | 2.06458  | 0.68696  |
| H | 1.11382  | 1.98122  | 1.77528  |
| C | 0.17696  | 3.26542  | 0.34876  |
| H | -0.05444 | 3.26168  | -0.72172 |
| H | 0.70322  | 4.18968  | 0.59356  |
| H | 2.71769  | -0.35087 | -1.69107 |
| C | 3.07634  | 0.75780  | 0.12728  |
| H | 3.09396  | 0.40069  | 1.16427  |
| C | -0.19595 | -0.73619 | -1.40069 |
| H | 0.26989  | -1.39450 | -2.13395 |
| N | 2.21501  | -1.56699 | -0.08036 |
| H | 1.34380  | -1.91287 | 0.30397  |
| C | 3.32789  | -2.29197 | 0.09005  |
| O | 4.43753  | -1.88205 | -0.29111 |
| C | 3.18174  | -3.62939 | 0.75616  |
| H | 3.55560  | -4.39567 | 0.07491  |
| H | 2.15097  | -3.85354 | 1.02748  |
| H | 3.80748  | -3.63935 | 1.65025  |
| O | -1.02217 | 3.24994  | 1.11745  |

|   |          |          |          |
|---|----------|----------|----------|
| H | -1.40417 | 2.36359  | 1.06029  |
| O | 2.46092  | 2.72937  | -1.16073 |
| H | 3.37304  | 2.71463  | -1.47721 |
| O | 4.39680  | 0.89350  | -0.37138 |
| H | 4.73503  | -0.01186 | -0.47647 |
| O | -0.63748 | -1.60015 | -0.32897 |
| N | -1.72603 | -0.95065 | 0.28579  |
| C | -1.55281 | -0.56312 | 1.59052  |
| O | -2.31375 | 0.27770  | 2.06402  |
| C | -0.49221 | -1.25430 | 2.38891  |
| H | -0.74939 | -1.17772 | 3.44360  |
| H | 0.45619  | -0.73987 | 2.21265  |
| H | -0.38081 | -2.29829 | 2.09834  |
| C | -1.49910 | -0.13685 | -1.92139 |
| H | -1.95303 | -0.81720 | -2.64008 |
| H | -1.35201 | 0.83546  | -2.38793 |
| C | -2.37101 | -0.03628 | -0.67385 |
| H | -2.34950 | 0.96830  | -0.24906 |
| C | -3.83641 | -0.43067 | -0.88874 |
| O | -4.24529 | -0.91458 | -1.94593 |
| N | -4.62907 | -0.20308 | 0.16120  |
| H | -4.20744 | 0.16098  | 1.00807  |
| C | -6.03617 | -0.56785 | 0.14103  |
| H | -6.55645 | -0.03873 | -0.65848 |
| H | -6.47728 | -0.29293 | 1.09576  |
| H | -6.15573 | -1.64159 | -0.01370 |

**h) 2-Conf-14**

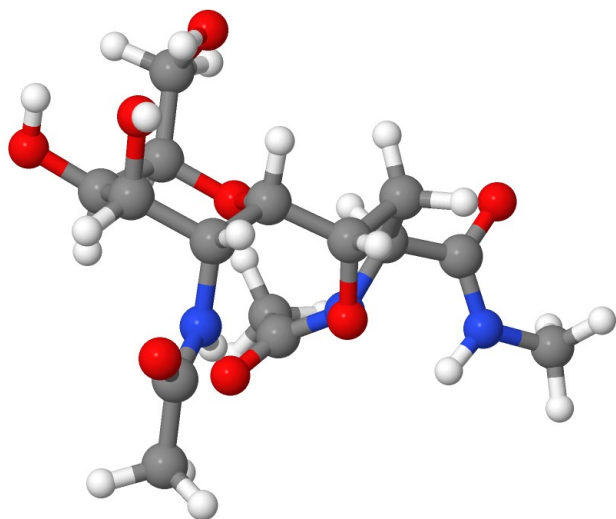

|   |          |          |          |
|---|----------|----------|----------|
| C | -2.77348 | -0.79214 | 1.01558  |
| H | -2.57779 | 0.04551  | 1.68856  |
| C | -1.89635 | 0.51879  | -0.94211 |
| C | -0.70742 | -0.43944 | -0.93524 |
| H | -0.96947 | -1.26610 | -1.60241 |
| O | -0.43449 | -0.93623 | 0.37503  |
| C | -1.49165 | -1.65292 | 1.01729  |

|   |          |          |          |
|---|----------|----------|----------|
| H | -1.18018 | -1.72400 | 2.06382  |
| C | -1.59455 | -3.10616 | 0.55985  |
| H | -2.35173 | -3.59898 | 1.18087  |
| H | -0.63367 | -3.57827 | 0.77424  |
| H | -2.12490 | 0.77111  | -1.98153 |
| C | -3.12448 | -0.18903 | -0.33854 |
| H | -3.92624 | 0.54068  | -0.19665 |
| C | 0.59331  | 0.13240  | -1.48318 |
| H | 0.40006  | 0.56740  | -2.46369 |
| N | -1.62514 | 1.74604  | -0.21254 |
| H | -0.86361 | 1.75916  | 0.46356  |
| C | -2.32839 | 2.86804  | -0.42776 |
| O | -3.24383 | 2.92547  | -1.26144 |
| C | -1.94489 | 4.06660  | 0.39552  |
| H | -2.81569 | 4.38128  | 0.97348  |
| H | -1.11388 | 3.86254  | 1.06969  |
| H | -1.67791 | 4.88069  | -0.28049 |
| O | -1.84918 | -3.33094 | -0.81910 |
| H | -2.59247 | -2.76791 | -1.09045 |
| O | -3.87255 | -1.49608 | 1.56462  |
| H | -4.19538 | -2.11595 | 0.89706  |
| O | -3.58542 | -1.24105 | -1.17850 |
| H | -3.98493 | -0.86914 | -1.97437 |
| O | 1.13524  | 1.20673  | -0.68847 |
| N | 1.89898  | 0.60675  | 0.32162  |
| C | 1.42490  | 0.79183  | 1.59406  |
| O | 0.54816  | 1.61428  | 1.83553  |
| C | 2.08152  | -0.03286 | 2.66015  |
| H | 1.56289  | -0.99591 | 2.70782  |
| H | 1.96428  | 0.47819  | 3.61343  |
| H | 3.13665  | -0.21750 | 2.46000  |
| C | 1.72942  | -0.88979 | -1.51169 |
| H | 2.39632  | -0.67913 | -2.34739 |
| H | 1.36551  | -1.91224 | -1.59190 |
| C | 2.46182  | -0.65547 | -0.17091 |
| H | 2.24433  | -1.45872 | 0.53234  |
| C | 3.96793  | -0.62613 | -0.38080 |
| O | 4.53382  | -1.66136 | -0.74981 |
| N | 4.60432  | 0.52532  | -0.18280 |
| H | 4.07449  | 1.31442  | 0.16096  |
| C | 6.04229  | 0.63613  | -0.37064 |
| H | 6.33826  | 1.66155  | -0.16504 |
| H | 6.57148  | -0.03431 | 0.30830  |
| H | 6.31258  | 0.38307  | -1.39649 |

i) 2-Conf-11

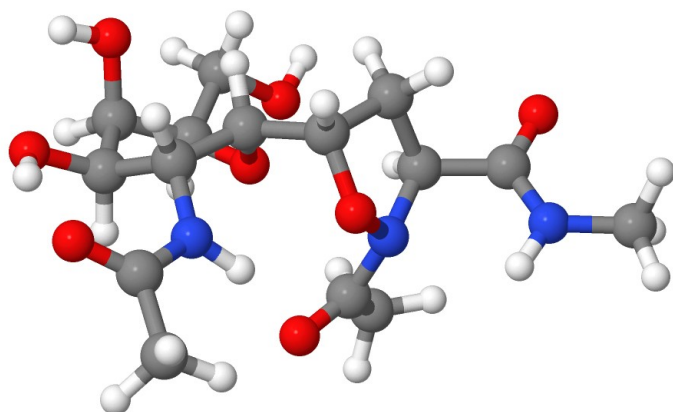

|   |          |          |          |
|---|----------|----------|----------|
| C | 2.65627  | 1.98232  | 0.30727  |
| H | 3.29495  | 2.47774  | 1.04488  |
| C | 2.12407  | -0.29815 | -0.71491 |
| C | 0.79461  | 0.44765  | -0.87614 |
| H | 0.97765  | 1.26278  | -1.58368 |
| O | 0.40072  | 0.98903  | 0.37892  |
| C | 1.20310  | 2.10794  | 0.77791  |
| H | 1.20268  | 2.07836  | 1.87028  |
| C | 0.55639  | 3.39883  | 0.32211  |
| H | 0.40617  | 3.38217  | -0.76155 |
| H | 1.21109  | 4.23969  | 0.57334  |
| H | 2.60607  | -0.35503 | -1.69477 |
| C | 3.04583  | 0.51244  | 0.23769  |
| H | 2.93739  | 0.09465  | 1.24584  |
| C | -0.37770 | -0.31693 | -1.47607 |
| H | -0.07151 | -0.74809 | -2.42902 |
| N | 1.93633  | -1.65929 | -0.22056 |
| H | 1.06296  | -1.88946 | 0.24635  |
| C | 2.94180  | -2.53957 | -0.17845 |
| O | 4.08090  | -2.26028 | -0.59597 |
| C | 2.63502  | -3.89866 | 0.38109  |
| H | 3.34251  | -4.11221 | 1.18357  |
| H | 1.61575  | -3.97358 | 0.75794  |
| H | 2.78648  | -4.63774 | -0.40808 |
| O | -0.69444 | 3.51076  | 0.99431  |
| H | -1.16834 | 4.26283  | 0.62377  |
| O | 2.83282  | 2.60995  | -0.95990 |
| H | 3.74186  | 2.43444  | -1.23492 |
| O | 4.40245  | 0.46310  | -0.17586 |
| H | 4.58469  | -0.46462 | -0.40609 |
| O | -0.83393 | -1.42943 | -0.68134 |
| N | -1.69818 | -0.89153 | 0.28285  |
| C | -1.24268 | -0.99340 | 1.57372  |
| O | -0.29936 | -1.72252 | 1.85384  |
| C | -2.00235 | -0.20195 | 2.59474  |
| H | -1.85112 | -0.65786 | 3.57087  |
| H | -3.06691 | -0.14059 | 2.36896  |
| H | -1.59130 | 0.81303  | 2.60717  |

|   |          |          |          |
|---|----------|----------|----------|
| C | -1.62809 | 0.55455  | -1.59507 |
| H | -2.23326 | 0.22139  | -2.43800 |
| H | -1.39030 | 1.61026  | -1.71464 |
| C | -2.36965 | 0.29323  | -0.26414 |
| H | -2.24641 | 1.13749  | 0.41404  |
| C | -3.85940 | 0.10804  | -0.50614 |
| O | -4.51898 | 1.07641  | -0.90077 |
| N | -4.37959 | -1.10064 | -0.30851 |
| H | -3.77933 | -1.83008 | 0.05091  |
| C | -5.79239 | -1.36249 | -0.53366 |
| H | -6.40715 | -0.73401 | 0.11241  |
| H | -5.98860 | -2.40766 | -0.30872 |
| H | -6.05643 | -1.16284 | -1.57292 |

j) **2-Conf-8**

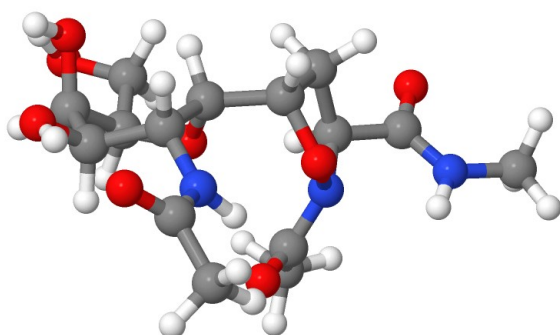

|   |          |          |          |
|---|----------|----------|----------|
| C | 2.75610  | 1.68105  | 0.31776  |
| H | 3.45851  | 2.08663  | 1.05171  |
| C | 1.98871  | -0.51763 | -0.74606 |
| C | 0.73789  | 0.35784  | -0.86368 |
| H | 0.98977  | 1.17055  | -1.55218 |
| O | 0.41420  | 0.89956  | 0.41318  |
| C | 1.33221  | 1.91180  | 0.84140  |
| H | 1.36709  | 1.83483  | 1.93018  |
| C | 0.76848  | 3.27038  | 0.43525  |
| H | -0.16350 | 3.44123  | 0.97559  |
| H | 0.55112  | 3.27216  | -0.63756 |
| H | 2.42950  | -0.61927 | -1.74167 |
| C | 3.02067  | 0.18961  | 0.17603  |
| H | 2.93088  | -0.25088 | 1.17642  |
| C | -0.50975 | -0.27721 | -1.46308 |
| H | -0.25469 | -0.71581 | -2.42773 |
| N | 1.67675  | -1.85237 | -0.24404 |
| H | 0.79085  | -1.99652 | 0.23358  |
| C | 2.59679  | -2.82164 | -0.20489 |
| O | 3.75000  | -2.65368 | -0.64228 |
| C | 2.17320  | -4.13936 | 0.37732  |
| H | 2.86421  | -4.40261 | 1.17950  |
| H | 2.25339  | -4.90130 | -0.40048 |
| H | 1.15399  | -4.11709 | 0.76128  |
| O | 1.65386  | 4.32850  | 0.77348  |

|   |          |          |          |
|---|----------|----------|----------|
| H | 2.41227  | 4.26649  | 0.17859  |
| O | 2.94141  | 2.35967  | -0.92351 |
| H | 3.83686  | 2.16063  | -1.22556 |
| O | 4.34575  | 0.04571  | -0.30962 |
| H | 4.44942  | -0.89513 | -0.53319 |
| O | -1.06182 | -1.35808 | -0.68550 |
| N | -1.86665 | -0.76233 | 0.29590  |
| C | -1.41714 | -0.93540 | 1.58108  |
| O | -0.54292 | -1.75375 | 1.83833  |
| C | -2.09779 | -0.10380 | 2.62589  |
| H | -1.59601 | 0.86874  | 2.66210  |
| H | -1.98478 | -0.59650 | 3.58922  |
| H | -3.15323 | 0.05974  | 2.40862  |
| C | -1.67357 | 0.70927  | -1.55348 |
| H | -2.31131 | 0.45236  | -2.39903 |
| H | -1.33946 | 1.74026  | -1.65322 |
| C | -2.43077 | 0.48869  | -0.22402 |
| H | -2.23155 | 1.30410  | 0.47119  |
| C | -3.93176 | 0.44366  | -0.46378 |
| O | -4.49785 | 1.46945  | -0.85818 |
| N | -4.56305 | -0.71030 | -0.26438 |
| H | -4.03459 | -1.49116 | 0.09959  |
| C | -5.99532 | -0.83616 | -0.48397 |
| H | -6.24352 | -0.60143 | -1.51973 |
| H | -6.54577 | -0.15990 | 0.17186  |
| H | -6.28755 | -1.86078 | -0.26918 |
